# Supplementary material for: The Chromatin Reader ZMYND8 Regulates Igh Enhancers to Promote Immunoglobulin Class Switch Recombination
Source: PubMed Central journal article supplement — Mol Cell. 2018 Nov 15;72(4):636–649.e8. doi: 10.1016/j.molcel.2018.08.042 (PMC6242708; doi:10.1016/j.molcel.2018.08.042), 2018-11-15
Supplement: mmc1.pdf [file mmc1.pdf]

**Molecular Cell, Volume 72**

**Supplemental Information**

**The Chromatin Reader ZMYND8**

**Regulates *Igh* Enhancers to Promote**

**Immunoglobulin Class Switch Recombination**

**Verónica Delgado-Benito, Daniel B. Rosen, Qiao Wang, Anna Gazumyan, Joy A. Pai, Thiago Y. Oliveira, Devakumar Sundaravinayagam, Wenzhu Zhang, Matteo Andreani, Lisa Keller, Kyong-Rim Kieffer-Kwon, Aleksandra Pękowska, Seolkyoung Jung, Madlen Driesner, Roman I. Subbotin, Rafael Casellas, Brian T. Chait, Michel C. Nussenzweig, and Michela Di Virgilio**

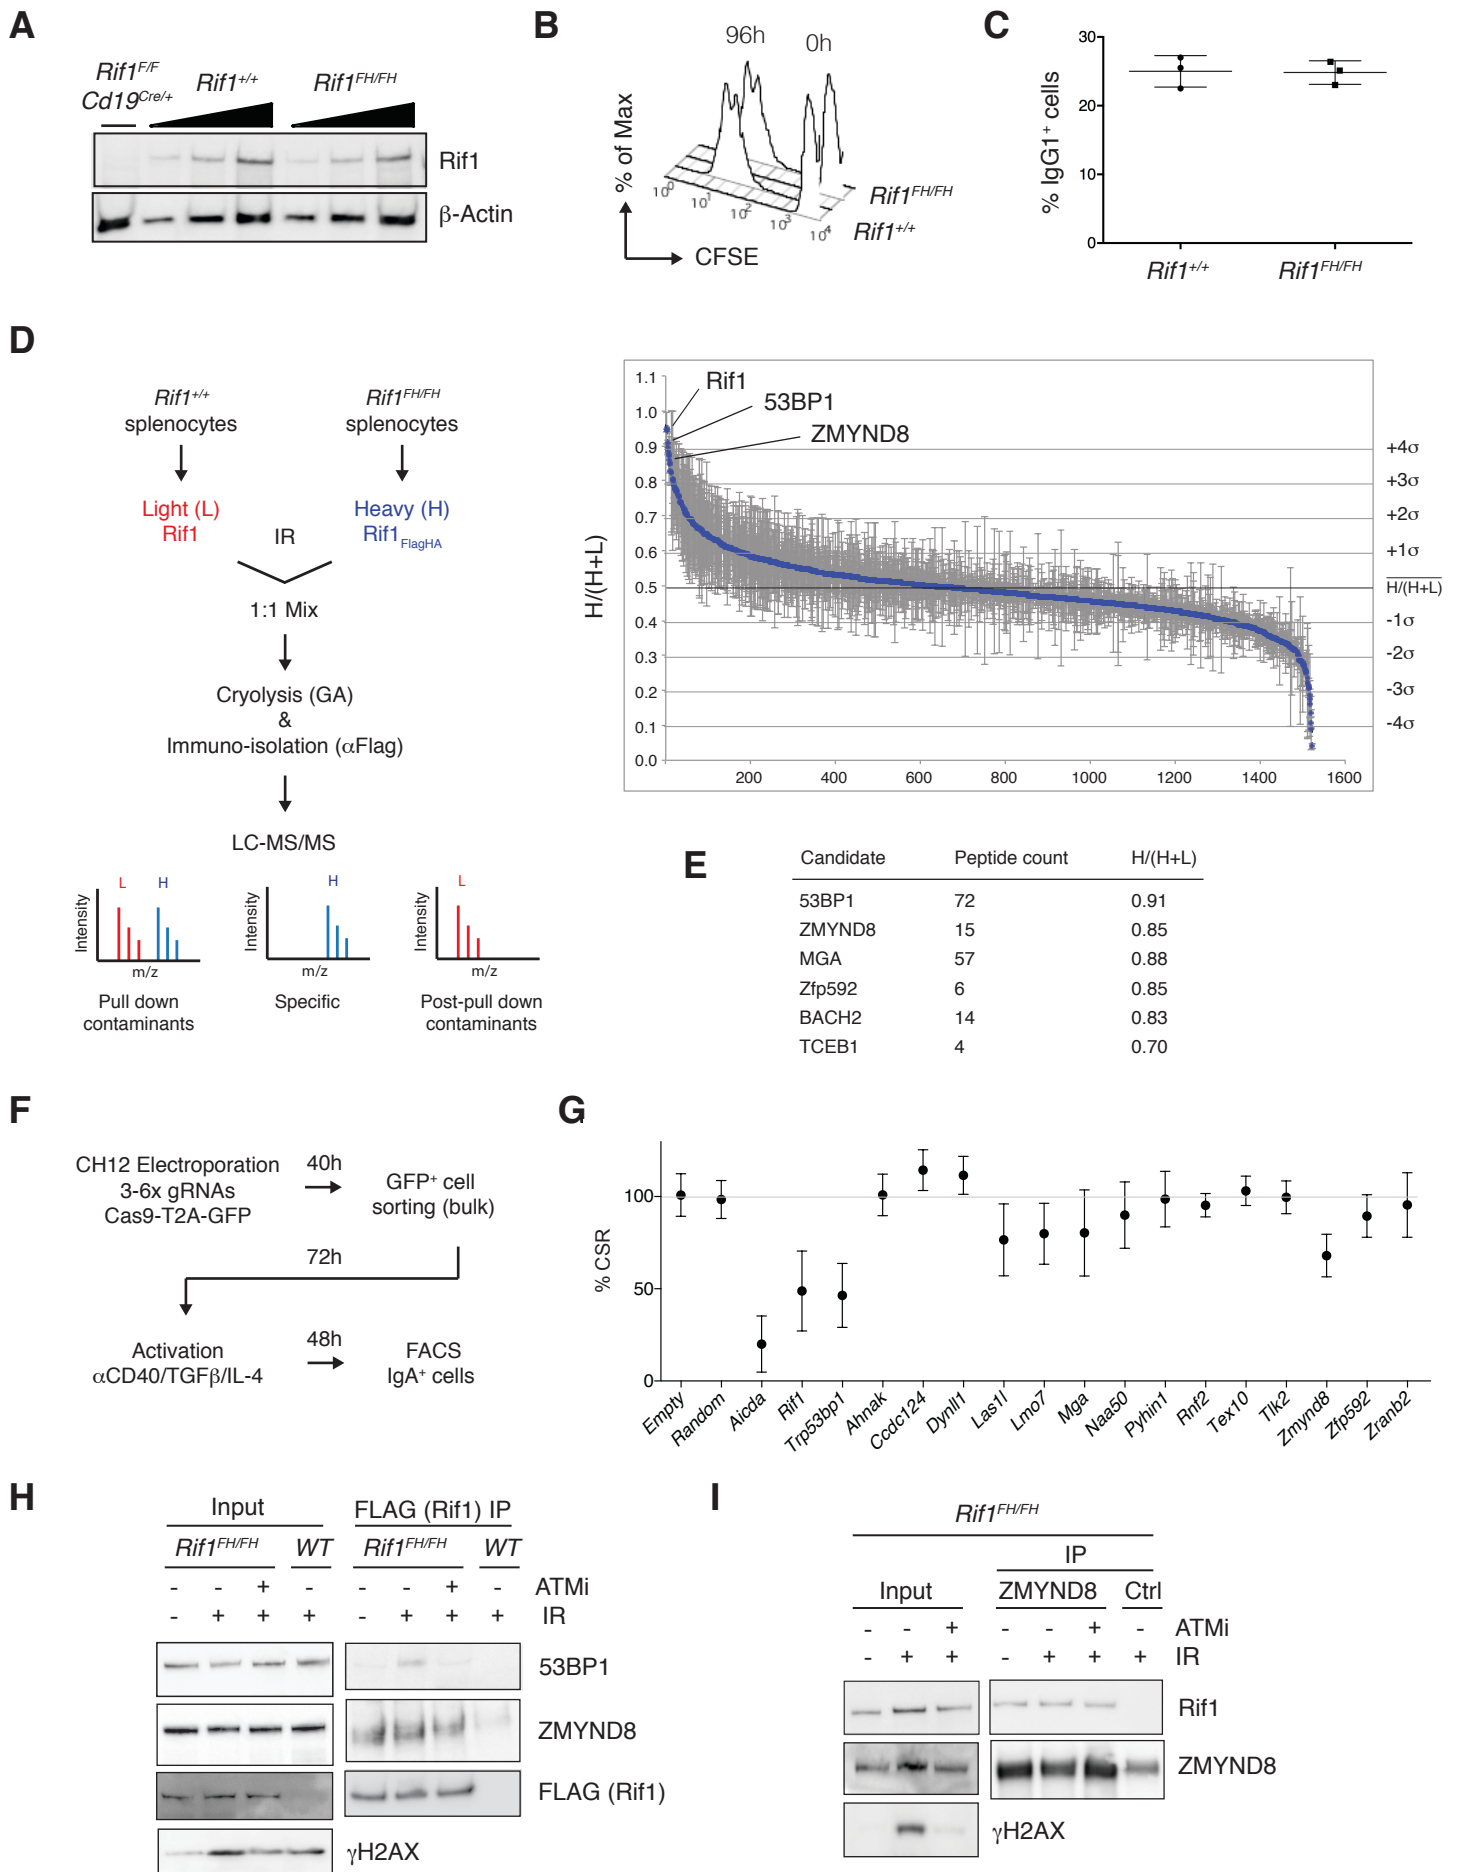

Figure S1

**Figure S1. Identification of Rif1 interacting proteins in primary B cells undergoing CSR, Related to Figure 1.** (A) Western blot analysis of whole cell extracts from *WT* (*Rif1*<sup>+/+</sup>) and *Rif1*<sup>FH/FH</sup> splenocytes. Triangles indicate threefold dilution. (B) Flow cytometry histograms measuring B cell proliferation by CFSE-dye dilution 96 h after stimulation with LPS, IL-4 and RP/14. (C) Summary dot plot for three independent experiments (n = three mice per genotype) measuring CSR to IgG1 96 hours after stimulation of B lymphocytes with LPS, IL-4 and RP/14. (D) Left: scheme of Rif1 I-DIRT in primary cultures of splenocytes. IR: ionizing radiation; GA: glutaraldehyde; LC-MS/MS: liquid chromatography-tandem mass spectrometry. Right: Graph depicting the distribution of identified Rif1 I-DIRT proteins as a function of their  $H/(H+L)$  ratio. Error bars represent the standard error of each candidate  $H/(H + L)$  mean value. Only proteins with peptide count  $\geq 4$  and posterior error probability (PEP)  $\leq 10^{-4}$  were included).

$\overline{H/(H + L)}$  and  $\sigma$  are the mean (0.49) and standard deviation (0.10) of the distribution, respectively. (E) Potential Rif1 interactors identified among top I-DIRT hits. (F) Schematic representation of the screen for loss-of-CSR following somatic targeting *via* CRISPR-Cas9 in CH12 cells. (G) Graph depicting residual CSR levels (% IgA<sup>+</sup> cells) measured after somatic targeting of the indicated I-DIRT hits in bulk CH12 cultures. The graph summarizes at least three independent experiments for each candidate. (H-I) Western blot analysis of anti-Flag(Rif1) (H), and anti- ZMYND8 (I) immunoprecipitates from *WT* and *Rif1*<sup>FH/FH</sup> B lymphocytes either left untreated or irradiated (10 gray (Gy), 45-min recovery) in the presence or absence of the ATM kinase inhibitor KU55933 (ATMi). Data are representative of at least two independent experiments for each co-immunoprecipitation.



**Figure S2. ZMYND8 is dispensable for B cell development, Related to Figure 2.** (A) Western blot analysis of whole cell extracts from *Cd19<sup>Cre/+</sup>* and *Zmynd8<sup>F/F</sup>Cd19<sup>Cre/+</sup>* B cells 72 h after stimulation with LPS and IL-4. Triangles indicate threefold dilution. (B) Representative flow cytometry analysis of lymphoid tissues from *Cd19<sup>Cre/+</sup>* and *Zmynd8<sup>F/F</sup>Cd19<sup>Cre/+</sup>* mice. (C) Summary graphs for six mice per genotype. (D) Western blot analysis of whole cell extracts from mature *Cd19<sup>Cre/+</sup>* B cells in resting conditions (0 h) and at the indicated times after stimulation with LPS and IL-4.

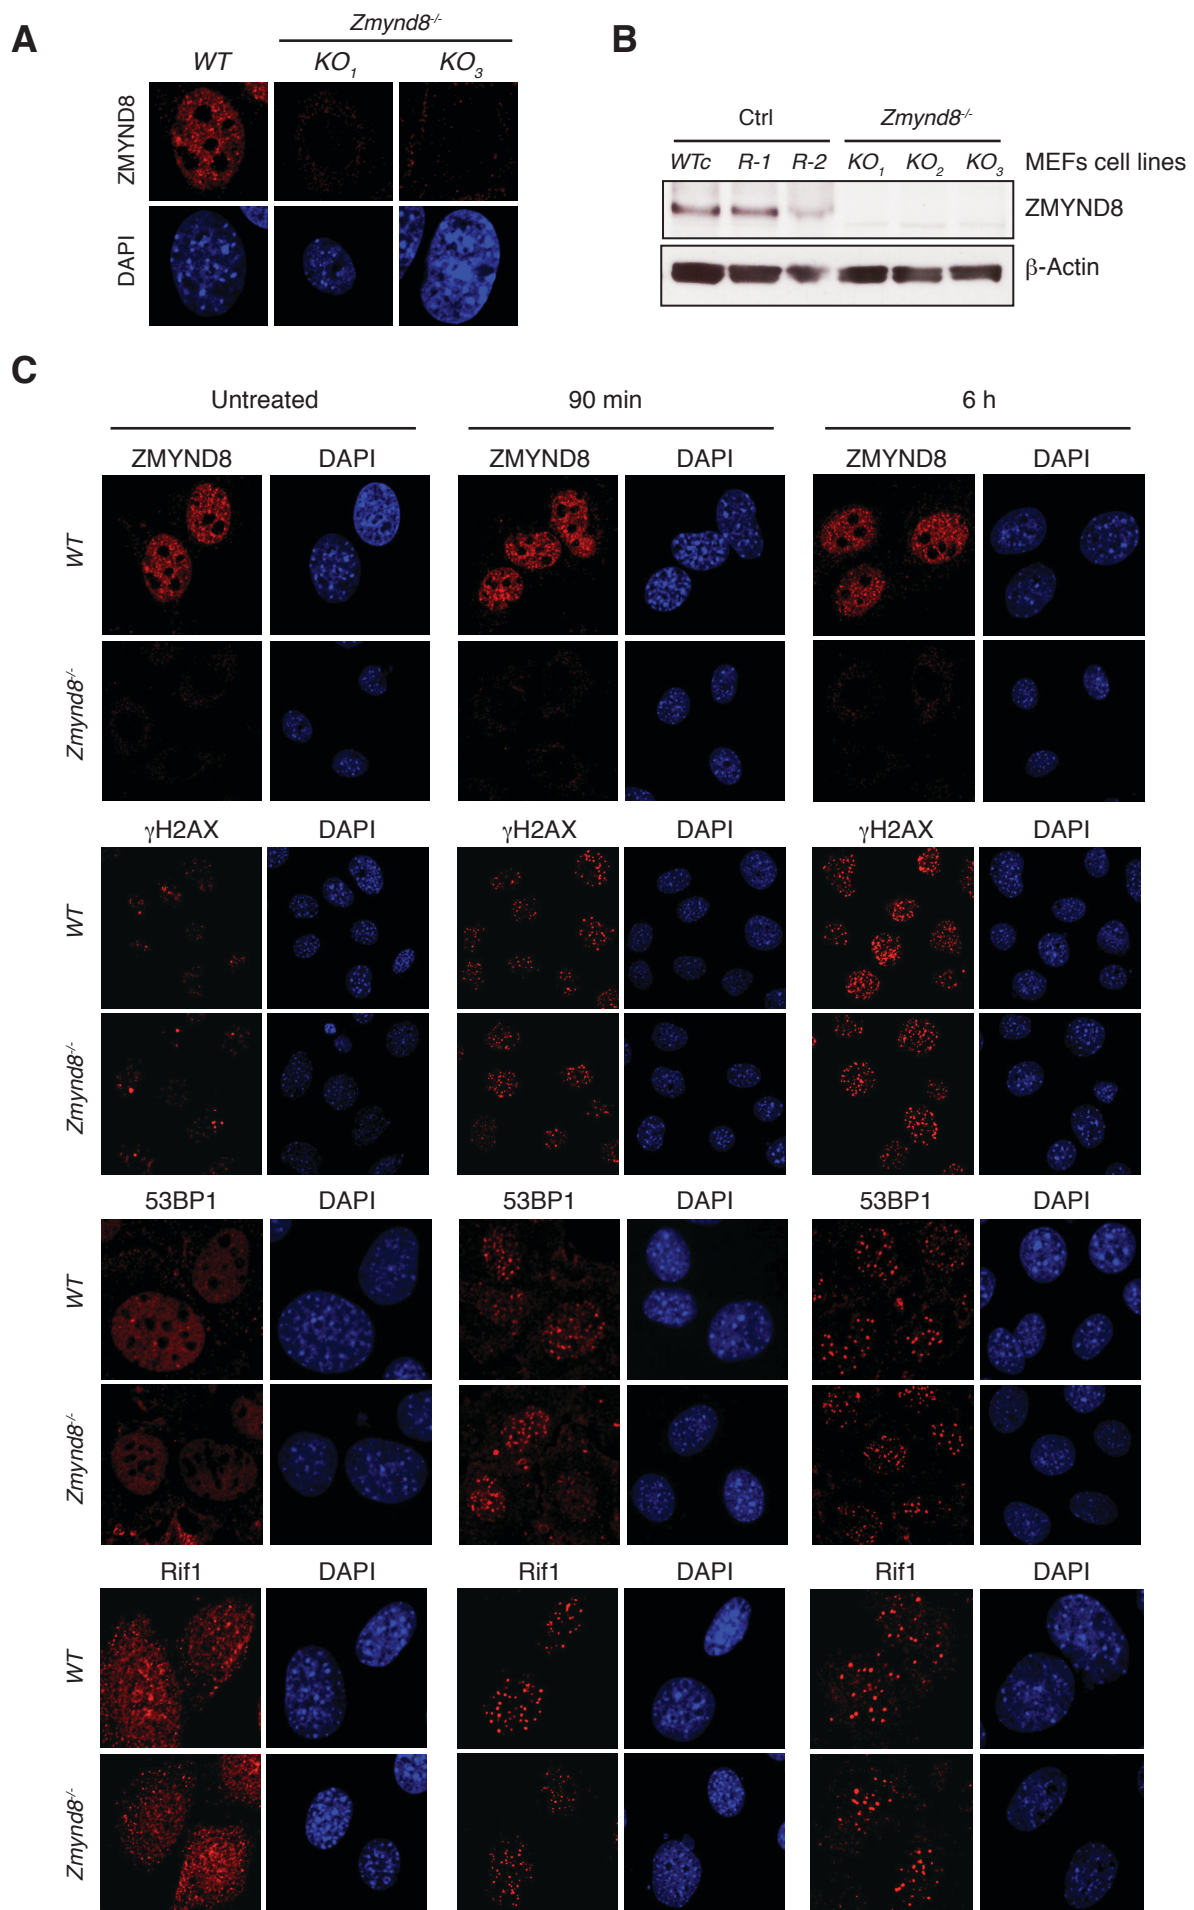

Figure S3

**Figure S3. ZMYND8-deficiency does not affect DSB-induced signaling, Related to Figures 1, 2, and S1.** (A-B) Immunofluorescent staining (A) and WB (B) analysis of *Zmynd8*<sup>-/-</sup> immortalized mouse embryonic fibroblast (iMEF) clonal cell lines. Ctrl iMEFs cell lines include a WT clonal derivative (WTc) and two clones generated by targeting iMEFs cells with a random sequence not present in the mouse genome (R-1 and R-2). *KO*<sub>1</sub>, *KO*<sub>2</sub>, and *KO*<sub>3</sub> are three independent *Zmynd8*<sup>-/-</sup> iMEFs cell lines. (C) Immunofluorescent staining for ZMYND8,  $\gamma$ H2AX, 53BP1, and Rif1 in irradiated (10 Gy) *Zmynd8*<sup>-/-</sup> (*KO*<sub>1</sub> clone) iMEFs. Data are representative of two independent experiments.

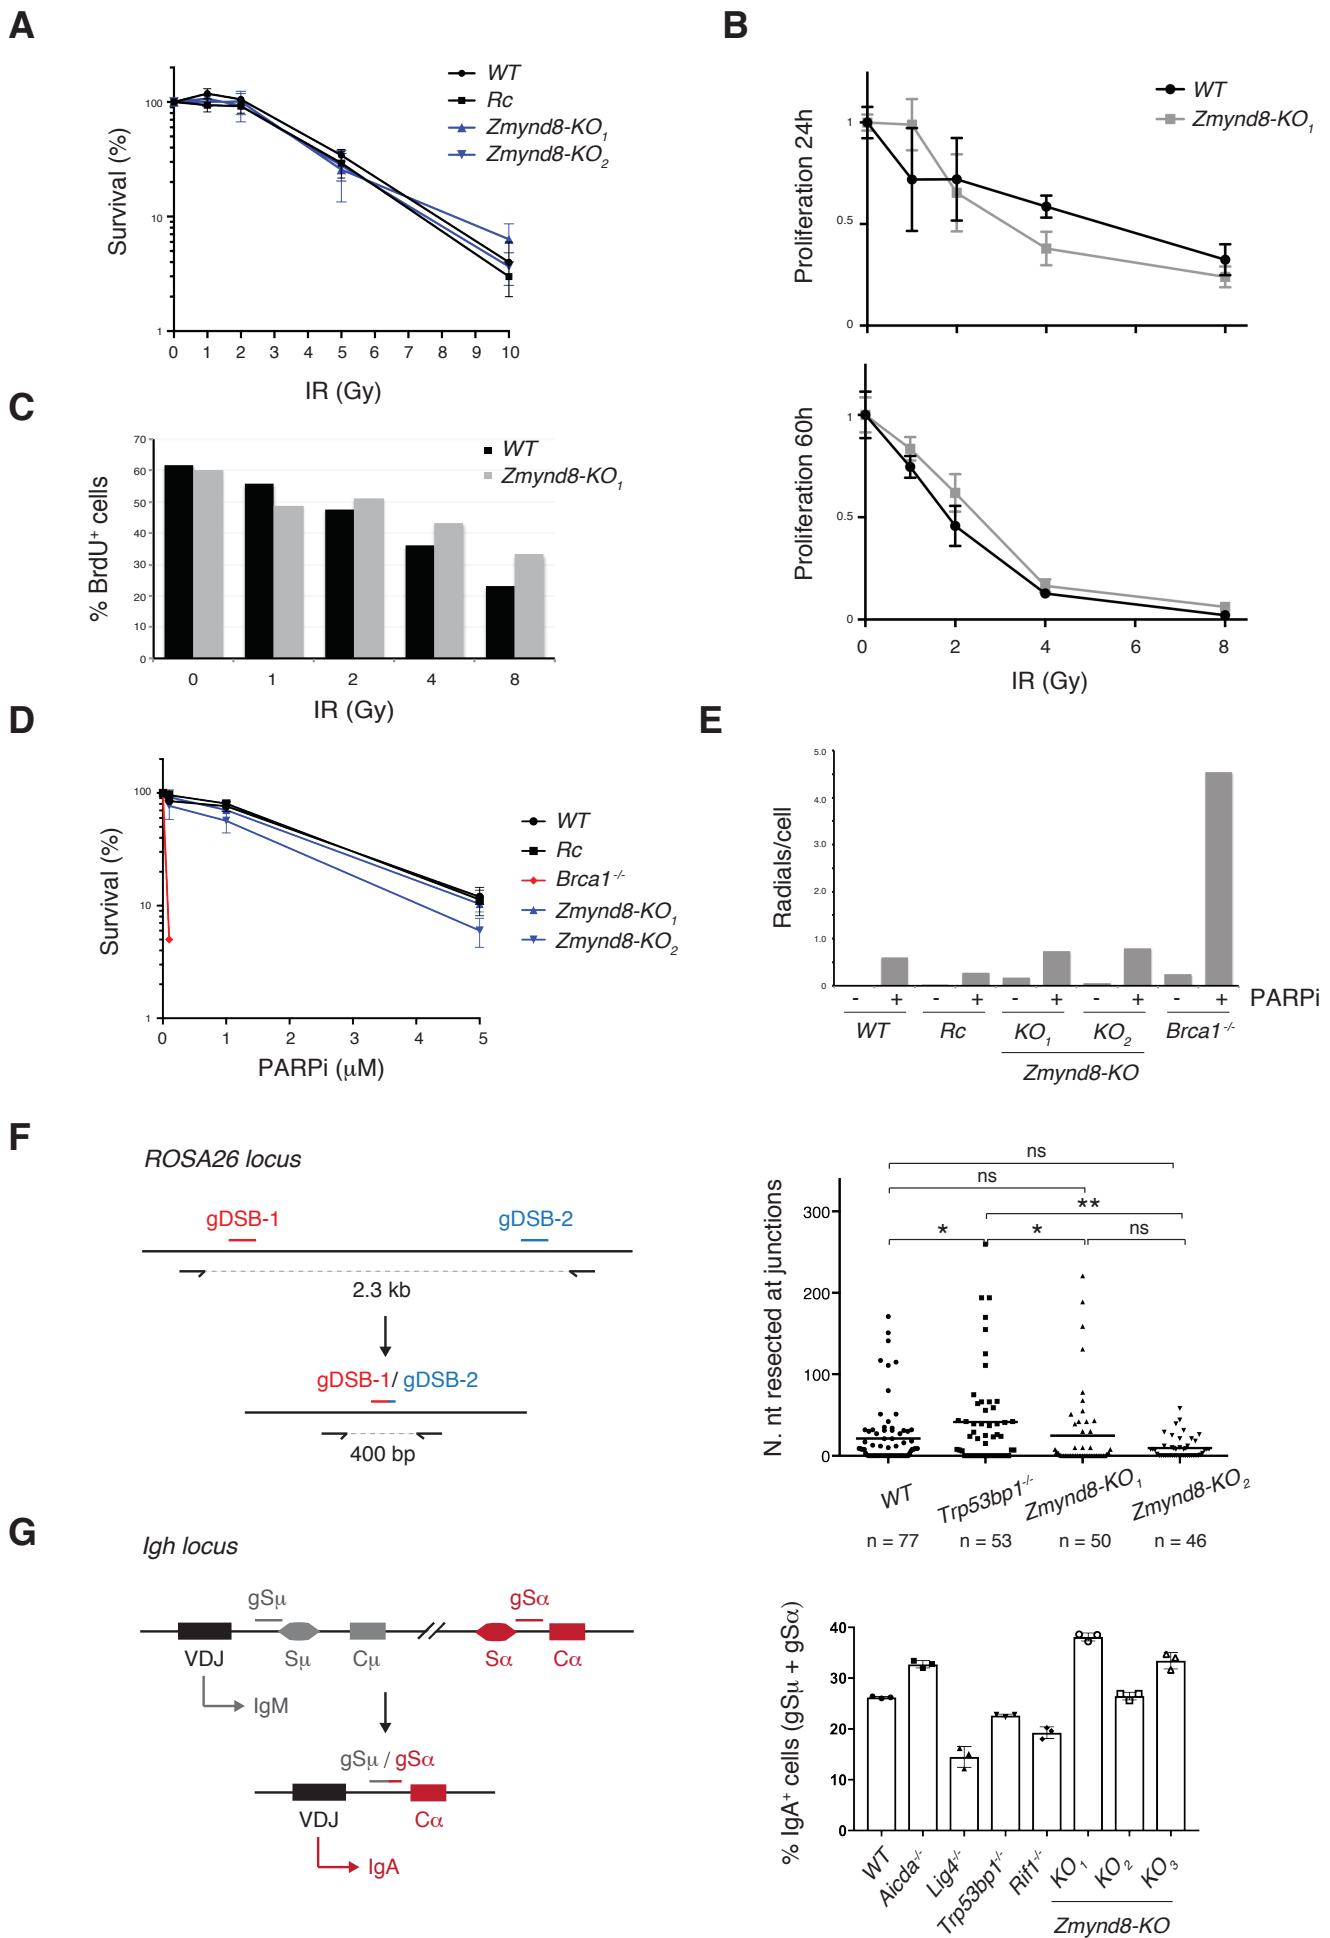

Figure S4



**Figure S4. *Zmynd8*<sup>-/-</sup> CH12 and MEFs cell lines do not exhibit major DSB repair defects, Related to Figures 1, 2, and S1.** (A) Colony formation assay of two independent *Zmynd8*<sup>-/-</sup> iMEF clones (*KO*<sub>1</sub> and *KO*<sub>2</sub>) following IR. Error bars represent the mean from triplicate plates per condition. Data are representative of two independent experiments. (B) Growth curves of WT and *Zmynd8*<sup>-/-</sup> CH12 cells after irradiation. (C) Cell cycle analysis of irradiated *Zmynd8*<sup>-/-</sup> CH12 lines as measured by BrdU incorporation. (D) Colony formation assay of *Zmynd8*<sup>-/-</sup> iMEF clones following PARPi treatment. Error bars represent the mean from triplicate plates per condition. Data are representative of two independent experiments. (E) Analysis of genomic instability in metaphases from PARPi (2 μM) -treated *Zmynd8*<sup>-/-</sup> iMEFs (n >= 42 metaphases analyzed per genotype). (F) Left: Schematic representation of the end resection assay. Right: Dot plot showing resection in sequences from joining products of two CRISPR-Cas9-induced DSBs at the *ROSA26* locus in two *Zmynd8*<sup>-/-</sup> CH12 cell lines (*KO*<sub>1</sub> and *KO*<sub>2</sub>). Each dot represents one junction product. Number of junctions analyzed per genotype is indicated below. p values were calculated with the Mann–Whitney U test. n.s.: not significant. nt: nucleotide. (G) Left: Schematic representation of CRISPR-Cas9-induced CSR assay. Right: Summary dot plot for three independent experiments measuring CSR to IgA after electroporation of unactivated CH12 cells lines of the indicated genotypes with WT Cas9 and gRNAs against Random or S<sub>α</sub> and S<sub>μ</sub> sequences. *KO*<sub>1</sub>, *KO*<sub>2</sub>, and *KO*<sub>3</sub> are three independent *Zmynd8*<sup>-/-</sup> CH12 cell lines.



**Figure S5. ZMYND8-deficiency impairs GLT of acceptor S regions but does not reduce the expression of known CSR factors, Related to Figures 1, 3, and 5.** (A-B) Dendrogram (A) and Principal Component Analysis (B) for WT CH12 cells (bulk and one clonal derivative WTc) and two *Zmynd8*<sup>-/-</sup> cell lines (*KO1* and *KO2*) under either unactivated or activated conditions (prefix “a” indicates stimulation for 48 h with  $\alpha$ CD40, TGF $\beta$  and IL-4). RNA-Seq analysis was performed on three biological replicates per condition. (C) Scatterplot for gene expression of known CSR factors in activated WT CH12 and *Zmynd8*<sup>-/-</sup> samples. Pairwise comparisons between WT and *Zmynd8*<sup>-/-</sup> cell lines are represented as different shapes, while CSR factors are denoted by color. Linear regression line shown in blue; identity line shown in grey. (D) GRO-Seq analysis of nascent RNA transcription at the indicated *Igh* regions in B lymphocytes stimulated for 24 h with LPS and IL-4. + and – indicate sense and antisense transcription, respectively. (E) Differential gene analysis of GRO-Seq data in panel D. pvalues were calculated with one-sided one sample t.test ( $\mu=0$ ) on log2FC (Ig $\epsilon$ : 0.0627, Ig $\gamma$ 1: 0.0057, Ig $\mu$ : 0.2319). Mean log2FC: Ig $\epsilon$ : -0.93, Ig $\gamma$ 1: -1.41, Ig $\mu$ : 0.047. Mut: mutant *Zmynd8*<sup>F/F</sup>*Cd19*<sup>Cre/+</sup>; Ctrl: control *Zmynd8*<sup>F/F</sup>.

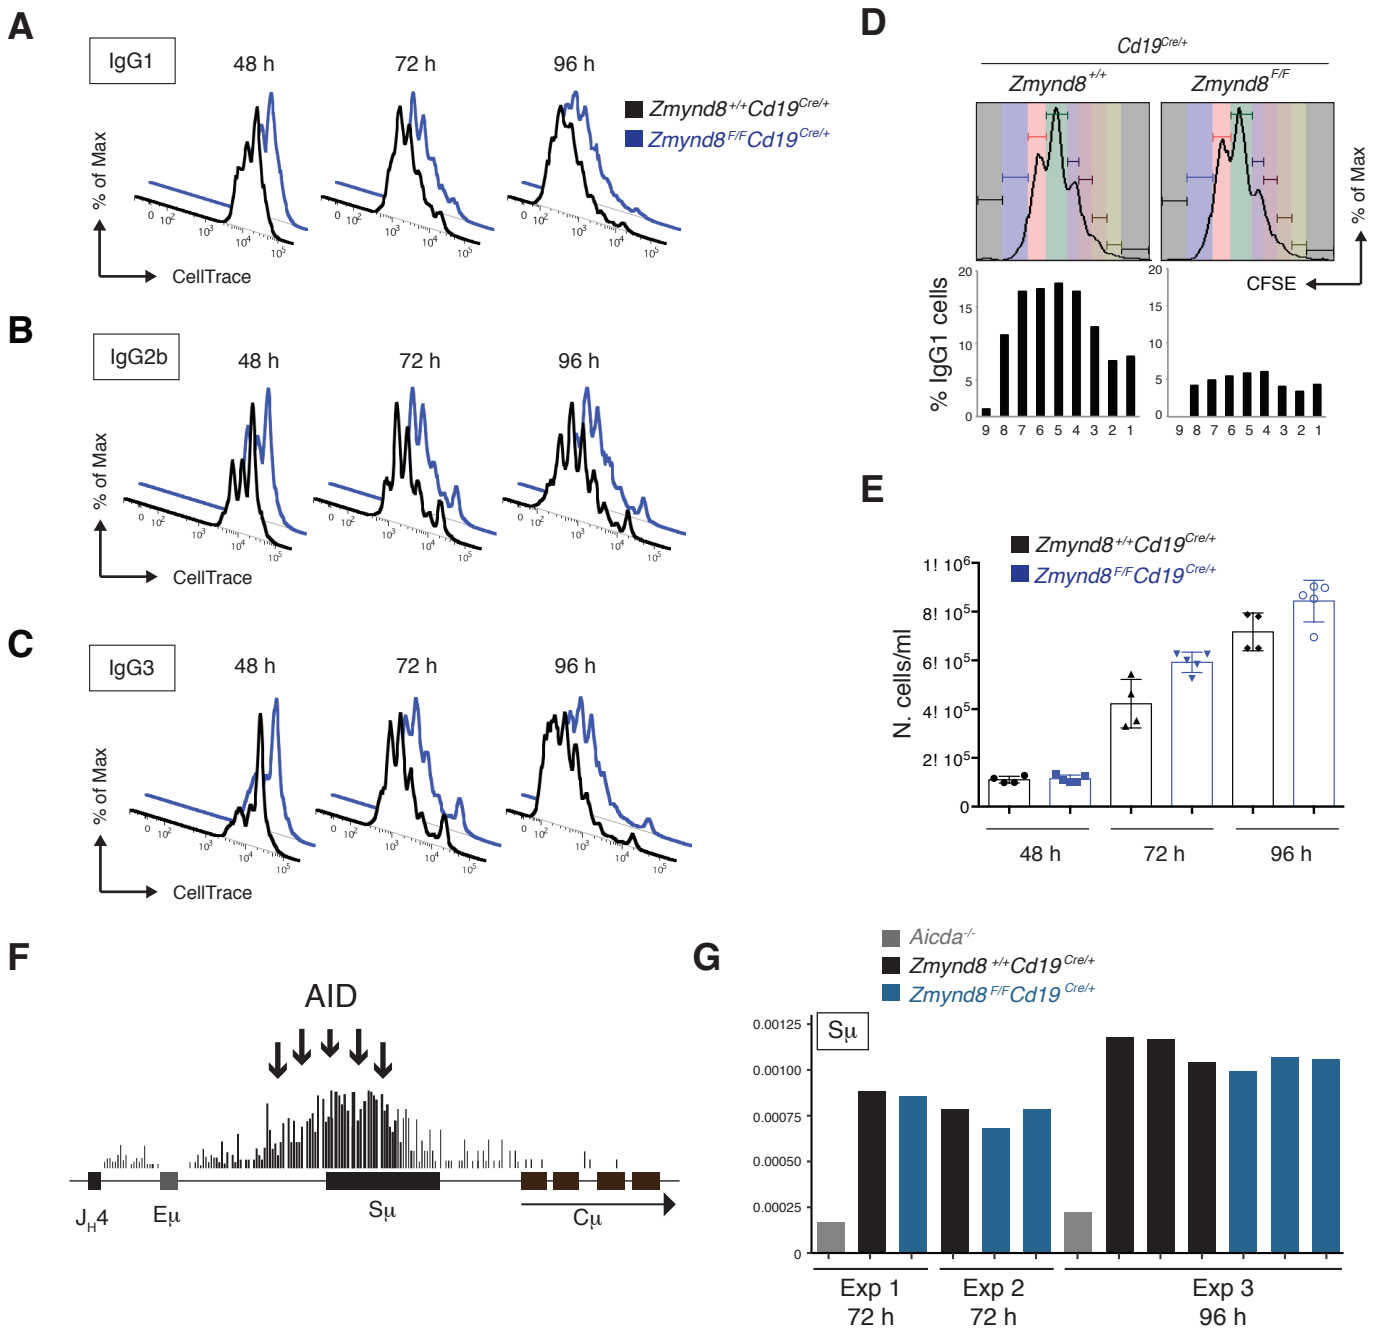

Figure S6

**Figure S6. ZMYND8-deficiency does not affect B cell proliferation or the frequency of mutations at 5'S $\mu$ , Related to Figures 2 and 6. (A-C)**

Proliferation analysis by CellTrace Violet dilution of primary cultures of *Cd19<sup>Cre/+</sup>* and *Zmynd8<sup>F/F</sup>Cd19<sup>Cre/+</sup>* B lymphocytes stimulated with LPS and IL-4 (A), LPS-BAFF-TGF $\beta$  (B), or LPS only (C). Data are representative of at least two mice per genotype. (D) Representative flow cytometry analysis showing the percentage of IgG1<sup>+</sup> cells per cell division in primary cultures of *Cd19<sup>Cre/+</sup>* and *Zmynd8<sup>F/F</sup>Cd19<sup>Cre/+</sup>* splenocytes stimulated with LPS and IL-4 for 72 h. Cell division as measured by CFSE dye dilution is shown on top. (E) Growth curves of primary B cell cultures from *Cd19<sup>Cre/+</sup>* and *Zmynd8<sup>F/F</sup>Cd19<sup>Cre/+</sup>* mice stimulated with LPS and IL-4. The graph summarizes two independent experiments with at least 4 mice per genotype tested in total. (F) Schematic representation of E $\mu$ -S $\mu$ -C $\mu$  region with footprint of AID-induced mutations. (G) Histogram depicting cumulative mutation frequencies as determined by mutational analysis by paired-end deep-sequencing (MutPE-Seq) at 5'-S $\mu$  in *CD19<sup>Cre/+</sup>*, *Zmynd8<sup>F/F</sup>CD19<sup>Cre/+</sup>*, and *AID<sup>-/-</sup>* splenocytes 72 h or 96 h after activation with LPS and IL-4. Three independent experiments are shown with each bar representing a different mouse.

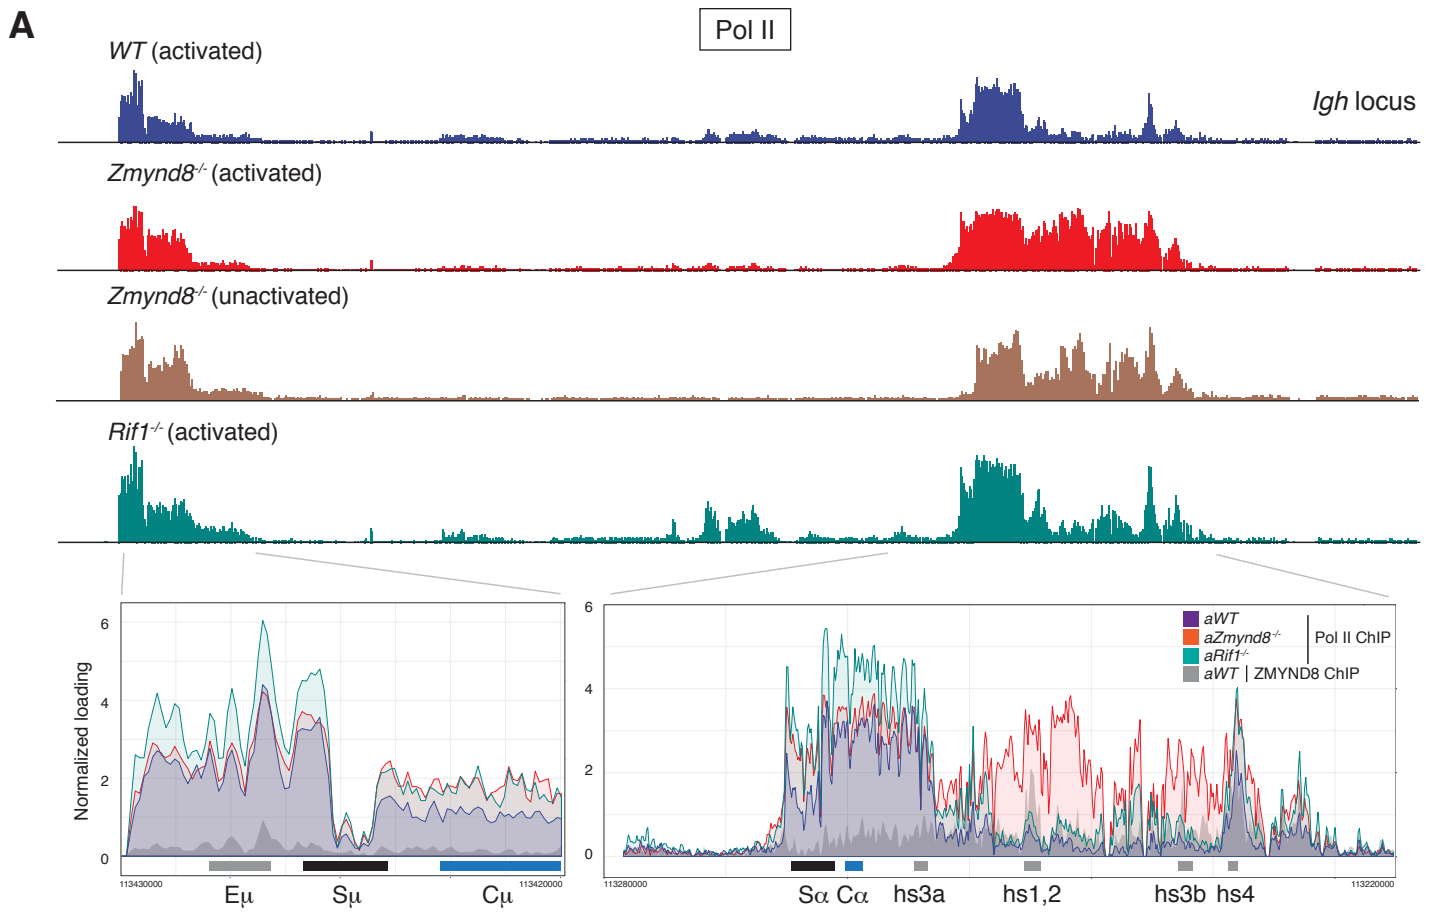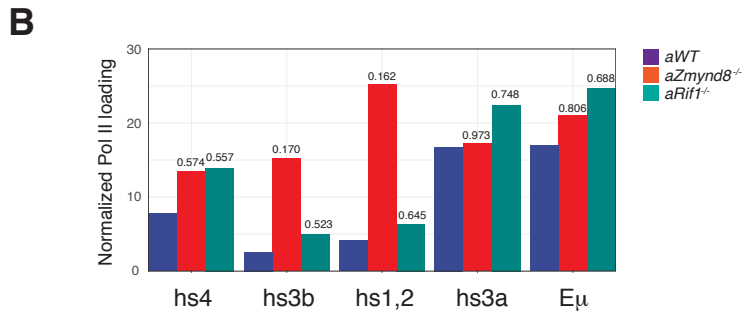

Figure S7

**Figure S7. RNA Pol II loading is increased at the 3' *Igh* enhancers of ZMYND8-deficient CH12 cells, Related to Figures 4 and 5.** (A) Top: RNA Pol II loading at the *Igh* locus in WT, *Zmynd8*<sup>-/-</sup>, and *Rif1*<sup>-/-</sup> CH12 cells. Bottom: ChIP-Seq tracks overlay at regions encompassing E<sub>μ</sub> and 3'RR enhancers. Regions zoomed-in in the insets were defined based on the location of ZMYND8 peaks from ZMYND8 ChIP-Seq in Fig. 4C (grey track). (B) RNA Pol II loading quantification at regions highlighted within the insets in panel A. Numbers above columns represent the ratio of RNA Pol II loading in WT to loading in knock-out cells. Prefix "a" indicates stimulation for 48 h with αCD40, TGFβ and IL-4.

**Table S1. S $\mu$ -S $\gamma$ 1 junction recombination analysis in *Zmynd8*<sup>F/F</sup>*Cd19*<sup>Cre/+</sup> and control B cells, Related to Figure 2.**

| S $\mu$ -S $\gamma$ 1      | <i>Cd19</i> <sup>Cre/+</sup> (30N)                                                                                                                                                                                                                                                                                                                                                                                                                                                                                                                                                                                                                                                                                  | <i>Zmynd8</i> <sup>F/F</sup> <i>Cd19</i> <sup>Cre/+</sup> (29N)                                                                                                                                                                                                                                                                                                                                                                                                                                                                                                                                                                                                               |
|----------------------------|---------------------------------------------------------------------------------------------------------------------------------------------------------------------------------------------------------------------------------------------------------------------------------------------------------------------------------------------------------------------------------------------------------------------------------------------------------------------------------------------------------------------------------------------------------------------------------------------------------------------------------------------------------------------------------------------------------------------|-------------------------------------------------------------------------------------------------------------------------------------------------------------------------------------------------------------------------------------------------------------------------------------------------------------------------------------------------------------------------------------------------------------------------------------------------------------------------------------------------------------------------------------------------------------------------------------------------------------------------------------------------------------------------------|
| Mouse #1                   | TTGAATGAGACTAACTCTACTGCCT <b>AC</b> AGGTGGGAGTGTGGGGATCCAGG<br>CACAGCTGACAGAATTGAGAAA <b>CAATAG</b> GACAGGTGGGAGTGTGGGGATCCAGGT<br>CGAGATGAGCCAACTGGAATGA <b>ACTT</b> :GTGTGGAGACCAGGGCAGAGCAGCTATA<br>AAAGAATGGTATCAAAAGGACAGT <b>INS80bp</b> AGGTAGAAATGAAGGATGGGCAT<br>TTGCTGAGCAAAATTAAGGGAA <b>CAAGGG</b> CAGAGTGGGAGTGTGGGGATCCAGGT<br>TTCTGAGCTGAGATGAGCTGGGGT <b>GAGC</b> CAGGTAAAGTGTGGGAACCCAGTCT<br>TTCTGCTTTGTTAAAGAAATG <b>GTATCAAA</b> TGACAGGCAGAGTAGCTATAGGGCAGCCAG<br>TTGAGAGCCCTAGTAAGCGAGCTCT <b>INS98bp</b> GGCAGAGCAGCTATAGGGCAGCCA<br>AACTCTACTGCCTACACTGGACTGT <b>CTG</b> GGTGCAGGACAGGTACAAGTTTAGATG<br>GTTTAATGAATTTGAAGTTGCCA <b>ATAAAT</b> ACAGGTAAGCAGGGACAGGTGGAAGTGT                  | GCTAAGCTAAACTAGGCTGGCTTAACCG:CCGGGTGAGCAATACAAGGGA <b>ACTGAT</b><br>TAGCTGAGATGGGGT <b>GAGATGGGGT</b> GAG:AGAGAAGCTGAGGGCAGGTAAAGAGTGT<br>CCACAGCTGTACAGAATTGAGAAA <b>TAATAG</b> GGTAAGTAGGGACAGGTGGAAGTGT<br>GCTAAACTAGGCTGGCTTAACCG:CCGGGTGAGCAATACAAGGGA <b>ACTGATG</b><br>TGGAAAGAAAAGATGTTTTAGTTTT <b>INS215bp</b> CCAGGCAGAGCAGCTATAGGGCAG<br>ACTCTCCAGCCACAGTAATGACCC <b>AGCA</b> AAATACAGGGAACTGATGGCAA<br>AATTAAGGGAACAAGGTTGAGAGCCAGCCAGGACAGCTGGGAGTGTGGG<br>TCAGCTATGCTACGCTGTGTTGGGGT <b>GAACTGATGG</b> CAATGGAAGGGCAGGGAC<br>TGAGATGGGTGGGCTTCTCGA <b>INS233bp</b> CAGGGCAGGTTAGAATGAAGGAT<br>GGTATGGATACCGAAGGAAGGCCAGGAA <b>GAATG</b> CAGATCCAACAGAA <b>G</b> |
| Mouse #2                   | AATGACCCAGACAGAGAAAGCCAG <b>ACT</b> GATGGCAAATGGAAGGGCAGGGAG<br>TAATGACCCAGACAGAGAAAGCC <b>CA</b> :CAAGACA <b>ACTAGA</b> AGTGTGTGAA<br>AAAGCATGGCTGAGCTGAGAT <b>GGGG</b> GCCAGAACAGGTGGGAGTGTG<br>TGAGGTGATTACTCTGAGGTAAAG <b>CAA</b> :TACATACGGGTAAAGCAGGGACAGGTG<br>GAATTGAGAAAGAAATAGAGACTGCCAGAGCTAAATGGCTACAGAGAAGCT<br>GAAGGCCAGACTCA <b>AAAGCTT</b> GT <b>GACA</b> CACTAGAAGTGTGTGAATCCAGG<br>CGAGAAGGAAGGCCACAGCTGTACATAGGCAGGTAAAGAGTGTGGGAACCC<br>AACTCAATGTGGTTAATGAATTTGA <b>AINS87bp</b> TAGAGGAACAGGGGCAGGT<br>GCTCTAAAAGCATGGCTGAGCT <b>GAGC</b> CAAGACA <b>ACTAGA</b> AGTGT<br>TACTGCCTACACTGGACTGT <b>CTGAG</b> CAAAATACAAGGAACTGATGGCA                                                            | GGCCACAGCTGTACAGAATTGAGAA <b>GAAT</b> GGGGATCCAGGTGCAGCTACAGG<br>AAAGGACAGTCTTAGATCCGAGGTGA:CCAGGACAGGTGGGAGTGTGGGGATCC<br>AGAATAGAGACCTGCAGTTGAGGGCAG <b>CAGGTA</b> AGCAGGGACAGGTGGAAGTGT<br>GGGGCTGGGGTATGGATACGCAGAA <b>AGGGA</b> ACTGATGGCAATGGAAGGG<br>CTACTACATTTCTGATCTACAACT <b>CAATG</b> AAGGATGTGCATCCTGGGTGAGCAAT<br>AAAGCTTGTGAGCAAAATTAAGGGAA:AGGGCAGGTTAGAATGAAGGATGT<br>ACTGAGGTGATTACTCTGAGGT <b>AAGCA</b> AGGGCAGGTAAAGACTGTGGGAACCC<br>AGAAAGCCAGACTCA <b>AAAGCTT</b> :TGGCAGGACAGGTACAAGTTTAGTAGTTA<br>TAAACTAGGCTGGCTTAACCGAG <b>ATGA</b> AGGATGGGCATCCCGGGTGAAGCAATA<br>TACAACTCAATGTGGTTAATGAATTTGA <b>A</b> :CAGTAAGGCAGGACTGGGGAGTCAA                 |
| Mouse #3                   | GCTTAGATCCAAGGTGAGTGTGAG <b>AINS140bp</b> TGGGGATCCAGGCAGTGTAGTTATA<br>CTGAGATGAGCTGGGGT <b>GAGCTCAG</b> <b>INS49bp</b> TACAGGGAAAGCTGAGGCAGGTA<br>AGATCCAAGGTGAGTGTGAGAGGACAG:TTGGGAGCCAGGACAGGTGGAAGTGT<br>GATACGCAGAAAGGAAGGCC <b>ACAGC</b> AGGGCAGGTGGAAGTGTGGAGACC<br>TGTGAGAGGACAGGGGCTGGGGT <b>TGAG</b> AGGAGCCAAGACA <b>ACTAGA</b> AGTGTGT<br>TTCTCTGAGCGCTTCAA <b>AAATGCGC</b> <b>INS31bp</b> TACAGGGAAAGCTGAGGCAGGTAAG<br>AGGCTCAA <b>AAAGCATGGCTGAG</b> CTG:TTAGAGGCAAGGACAGGGAAAGCT<br>AGAGCCCTAGTAAGCGAGGCTCA <b>AINS38bp</b> TACAGGGAAAGCTGAGGCAGGTAAGAG<br>CAGAGAAGGCCAGACTCA <b>AAAINS82bp</b> TGCTGCAGCTACAGGTAAAGCAGGGACAG<br>GCTTAGATCCAAGGTGAGTGTGAG <b>AINS140bp</b> TGGGGATCCAGGCAGTGTAGTTATA | GGTATGGATACCGAAGGAAGGCCAC <b>ACC</b> AGGTGGGACTGTGGGGATCCAGGT<br>TAAATGCGCTAA <b>ACTGAGGTGATTA</b> AAACCACAGAAAGGACAGGAGCTAA<br>GGTATGGATACCGAAGGAAGGCCAC <b>ACC</b> AGGTGGGACTGTGGGGATCCAGGT<br>TGATACGCAGAAAGGAAGGCCACAG:AGGGTGCAGGACAGGTACAAGTTT<br>TAAAAAGCAGCTGAGCTGAGATGGGGGAGTGTGGGGATCCAGGTAAAGCAGG<br>TAGACTGAGCTGAGCTAGGGT <b>GAGCTGAG</b> GGATGGGCATCCCGGGTGAAGCAATA<br>GATGTTTTTAGTTTTATAG <b>AGGCA</b> AGGGAAAGCTTAGGGAAACCA<br>CTGAGCAAAATTAAGGGAA <b>CAAGGTTGAT</b> GGGCATCCCGGGTGAAGCAATA<br>GAGAAAGCCAGACTCA <b>AAAGCTT</b> GT <b>INS191bp</b> GGACAGGTGGAAGTGTGGAG                                                                                          |
| Summary                    |                                                                                                                                                                                                                                                                                                                                                                                                                                                                                                                                                                                                                                                                                                                     |                                                                                                                                                                                                                                                                                                                                                                                                                                                                                                                                                                                                                                                                               |
| Blunt                      | 17%                                                                                                                                                                                                                                                                                                                                                                                                                                                                                                                                                                                                                                                                                                                 | 28%                                                                                                                                                                                                                                                                                                                                                                                                                                                                                                                                                                                                                                                                           |
| Nt. additions / insertions | 33%                                                                                                                                                                                                                                                                                                                                                                                                                                                                                                                                                                                                                                                                                                                 | 17%                                                                                                                                                                                                                                                                                                                                                                                                                                                                                                                                                                                                                                                                           |
| 1/2 bp microhomology       | 30%                                                                                                                                                                                                                                                                                                                                                                                                                                                                                                                                                                                                                                                                                                                 | 31%                                                                                                                                                                                                                                                                                                                                                                                                                                                                                                                                                                                                                                                                           |
| > 2 bp microhomology       | 20%                                                                                                                                                                                                                                                                                                                                                                                                                                                                                                                                                                                                                                                                                                                 | 24%                                                                                                                                                                                                                                                                                                                                                                                                                                                                                                                                                                                                                                                                           |

Blunt junctions are indicated with “:”, micro-homology in **bold**, mutations in *italics*, and nucleotide additions are underlined. Micro-homology at the junction was determined by identifying the longest region at the switch junction of perfect uninterrupted donor/acceptor identity. INS: insertion. Results from 3 mice per genotype are shown.



**Table S5. List of oligonucleotides used in this study, Related to STAR****Methods.***Genotyping*

| Primer name     | Sequence (5'→3')     | Reference                                    |
|-----------------|----------------------|----------------------------------------------|
| Prkcbp1_35576_5 | GACCACAGCTCTTGACAGG  | <i>EMMA/ Wellcome Trust Sanger Institute</i> |
| ZMYND8_R2 (Rev) | AAGAAAACCCTGAGACCACC | <i>This paper</i>                            |
| MDV_p240 (Fw)   | GTGCAAACGTGTTTCAGTGG | <i>This paper</i>                            |

*CRISPR-Cas9 gene targeting*

| gRNA                      | Sequence (5'→3')                             | Reference         |
|---------------------------|----------------------------------------------|-------------------|
| gZmynd8-1                 | AGAAAACGGCCCCGAAACGG                         | <i>This paper</i> |
| gZmynd8-2                 | AAGTCATTCCGTCCGTCCTG                         | <i>This paper</i> |
| gZmynd8<br>Nickase pair 1 | GTCTTGGGGCGAATGGCCAT<br>ATTA AAAAGAAAAGAAACC | <i>This paper</i> |
| gZmynd8<br>Nickase pair 2 | GACACTTAGCGTGATAAACC<br>GAGACTGACATCGGAGCCAG | <i>This paper</i> |
| gAID                      | TGAGACCTACCTCTGCTACG                         | <i>This paper</i> |
| Ctrl gRandom              | GCGAGGTATTCGGCTCCGCG                         | <i>This paper</i> |
| Ctrl gRandom              | ATGTTGCAGTTCGGCTCGAT                         | <i>This paper</i> |
| g53BP1<br>Nickase pair    | CAGATGTTTATTATGTGGAT<br>GAGTGTACGGACTTCTCGAA | <i>This paper</i> |
| gRif1<br>Nickase pair     | AAGTCTCCAGAAGCGGCTCC<br>GAAGACCCCTCGGTGCCTCC | <i>This paper</i> |

*Quantitative pCR*

| Aicda                                         | Sequence (5'→3')            | Reference                     |
|-----------------------------------------------|-----------------------------|-------------------------------|
| AID-F (Fw)                                    | GAAAGTCACGCTGGAGACCG        | <i>Xu et al., 2015</i>        |
| AID-R (Rev)                                   | TCTCATGCCGTCCCTTGG          | <i>Xu et al., 2015</i>        |
| <b>pre-spliced GLT <math>\gamma</math>1</b>   |                             |                               |
| MDV_g1-3b (Fw)                                | CAGGATCAATCCCAGCATTGGG      | <i>This paper</i>             |
| MDV_g1-1 (Rev)                                | CTGTGCTTGGATCACCACACTTCC    | <i>Oruc et al., 2007</i>      |
| <b>pre-spliced GLT <math>\gamma</math>3</b>   |                             |                               |
| MDV_g3-3 (Fw)                                 | GTGGA ACTCTAAGGTTTAGGAGTCAA | <i>Oruc et al., 2007</i>      |
| MDV_g3-1 (Rev)                                | CTGTGGCTGCTCAACTTGGTACCTT   | <i>This paper</i>             |
| <b>pre-spliced GLT <math>\gamma</math>2b</b>  |                             |                               |
| MDV_g2b-3 (Fw)                                | GTTGACCTGACCTAGAGACTGGTGGAC | <i>Oruc et al., 2007</i>      |
| MDV_g2b-1 (Rev)                               | CTTTCTTTCAGCTTCATTCATGGAAC  | <i>Oruc et al., 2007</i>      |
| <b>post-spliced GLT <math>\gamma</math>1</b>  |                             |                               |
| Ig1 (Fw)                                      | GGCCCTTCCAGATCTTTGAG        | <i>Muramatsu et al., 2000</i> |
| Cg1R (Rev)                                    | GGATCCAGAGTTCAGGTCAC T      | <i>Muramatsu et al., 2000</i> |
| <b>post-spliced GLT <math>\gamma</math>3</b>  |                             |                               |
| Ig3F (Fw)                                     | TGGGCAAGTGGATCTGAACA        | <i>Muramatsu et al., 2000</i> |
| Cg3R (Rev)                                    | CTCAGGGAAGTAGCCTTTGACA      | <i>Muramatsu et al., 2000</i> |
| <b>post-spliced GLT <math>\gamma</math>2b</b> |                             |                               |

|                                          |                            |                               |
|------------------------------------------|----------------------------|-------------------------------|
| MDV_p243 (Fw)                            | CACTGGGCCTTTCCAGAACTA      | <i>Muramatsu et al., 2000</i> |
| MDV_p244 (Rev)                           | CACTGAGCTGCTCATAGTGTAGAGTC | <i>Muramatsu et al., 2000</i> |
| <b>post-spliced GLT <math>\mu</math></b> |                            |                               |
| ImF (Fw)                                 | CTCTGGCCCTGCTTATTGTTG      | <i>Muramatsu et al., 2000</i> |
| CmR (Rev)                                | GAAGACATTTGGGAAGGACTGACT   | <i>Muramatsu et al., 2000</i> |
| <b>3'RR hs1,2</b>                        |                            |                               |
| MDV_p324 (Fw)                            | CATTGAGCTCCGGCTCTAAC       | <i>This paper</i>             |
| MDV_p325 (Rev)                           | CAAGAGGACATGACAGGAGATG     | <i>This paper</i>             |
| <b>3'RR 5' hs3b</b>                      |                            |                               |
| MDV_p314 (Fw)                            | CATTGAGCTCCGGCTCTAAC       | <i>This paper</i>             |
| MDV_p315 (Rev)                           | CCCCTGTAGGGATCCTCCTAAT     | <i>This paper</i>             |
| <b>3'RR 3' hs3b</b>                      |                            |                               |
| MDV_p316 (Fw)                            | CATCCAGAGTCAAGGGGTGTC      | <i>This paper</i>             |
| MDV_p317 (Rev)                           | CTAGAACCACATGCTATCTAAGGGA  | <i>This paper</i>             |

#### End resection assay

| <b>gRNAs</b>               | <b>Sequence (5'→3')</b> | <b>Reference</b>  |
|----------------------------|-------------------------|-------------------|
| gDSB-1                     | AGTTGTCATTGCTGAATATC    | <i>This paper</i> |
| gDSB-2                     | CATGGATTTCTCCGGTGAAT    | <i>This paper</i> |
| <b>First round of PCR</b>  |                         |                   |
| MA_p45 (Fw)                | CTGTTAGAGCATGCTTAAGGG   | <i>This paper</i> |
| MA_p42 (Rev)               | TCACCATTAGGGCAAATGGC    | <i>This paper</i> |
| <b>Second round of PCR</b> |                         |                   |
| MA_p51 (Fw)                | GTAGTACTTGGCAGGCTCC     | <i>This paper</i> |
| MA_p48 (Rev)               | AAAGTCATTCCACAGTTTGAC   | <i>This paper</i> |

#### MutPE-Seq

| <b>First round of PCR</b>  | <b>Sequence (5'→3')</b>                                           | <b>Reference</b>         |
|----------------------------|-------------------------------------------------------------------|--------------------------|
| QW_506 (Fw)                | TCTACTCTTTCCCTACACGACGCTCT<br>TCCGATCTTCTCTGAGTGCTTCTAAAAT<br>GCG | <i>Wang et al., 2017</i> |
| QW_507 (Rev)               | GTGACTGGAGTTCAGACGTGTGCTCTT<br>CCGATCTTCACCCCAACACAGCGTAGC        | <i>Wang et al., 2017</i> |
| <b>Second round of PCR</b> |                                                                   |                          |
| QW_501 (Fw)                | AATGATACGGCGACCACCGAGATCTAC<br>ACTCTTCCCTACACGAC                  | <i>Wang et al., 2017</i> |
| QW_OutIndex (Rev)          | CAAGCAGAAGACGGCATAACGAGAT6ntIn<br>dexGTGACTGGAGTTCAGACGTGTG       | <i>Wang et al., 2017</i> |

#### GRO-Seq

| <b>Primer name</b> | <b>Sequence (5'→3')</b>                                                                      | <b>Reference</b>            |
|--------------------|----------------------------------------------------------------------------------------------|-----------------------------|
| RT-primer          | /5Phos/GATCGTCCGACTGTAGAACTCTG<br>AAC/idSp/CAAGCAGAAGACGGCATAACG<br>ATTTTTTTTTTTTTTTTTTTTTVN | <i>Ingolia et al., 2009</i> |
| oNTI201 (Fw)       | AATGATACGGCGACCACCGACAGGTTC<br>AGAGTTCTACAGTCCGACG                                           | <i>Ingolia et al., 2009</i> |
| oNTI200 (Rev)      | CAAGCAGAAGACGGCATA                                                                           | <i>Ingolia et al., 2009</i> |

### Switch junctional analysis

| First round of PCR         | Sequence (5'→3')                              | Reference                       |
|----------------------------|-----------------------------------------------|---------------------------------|
| 5m3 (Fw)                   | AATGGATACCTCAGTGGTTTTTAATGGT<br>GGGTTTAATATAG | <i>Di Virgilio et al., 2013</i> |
| gamma1R (Rev)              | TGCCAATTAGCTCCTGCTCTTCTGTGG                   | <i>Di Virgilio et al., 2013</i> |
| <b>Second round of PCR</b> |                                               |                                 |
| 5m3-1 (Fw)                 | GGCTAAGAAGGCAATCCTGGGATTCTG<br>G              | <i>Di Virgilio et al., 2013</i> |
| gamma1R-1 (Rev)            | CTCTTACCTGCCTAGCTTCTCTGTAGCC                  | <i>Di Virgilio et al., 2013</i> |

### SHM analysis

| J <sub>H</sub> 4      | Sequence (5'→3')                      | Reference                  |
|-----------------------|---------------------------------------|----------------------------|
| VHA (Fw)              | ARGCCTGGGRCTTCAGTGAAG                 | <i>Sander et al., 2015</i> |
| VHE (Fw)              | GTGGAGTCTGGGGGAGGCTTA                 | <i>Sander et al., 2015</i> |
| JH4_intron (Rev)      | CTCCACCAGACCTCTCTAGACAGC              | <i>Sander et al., 2015</i> |
| <b>J<sub>k</sub>5</b> |                                       |                            |
| VK (Fw)               | GGCTGCAGSTTCAGTGGCAGTGGRTCW<br>GGRAC  | <i>Rouaud et al., 2013</i> |
| JK5_PR (Rev)          | AGCGAATTCAACTTAGGAGACAAAAGAG<br>AGAAC | <i>Rouaud et al., 2013</i> |
